# Supplementary material for: The fate of mamaku gum in the gut: effect on in vitro gastrointestinal function and colon fermentation by human faecal microbiota
Source: Royal Society of Chemistry journal article supplement (doi:10.1039/d3fo01665j), 2023-01-01
Supplement: d3fo01665j1.pdf [file d3fo01665j1.pdf]

# The fate of mamaku gum in the gut: Effect on *in vitro* gastrointestinal function and colon fermentation by human faecal microbiota

## Supplementary Information

Akshay Bisht<sup>a,b</sup>, Kelvin K. T. Goh<sup>a</sup>, Lara Matia-Merino<sup>a\*</sup>

<sup>a</sup> School of Food and Advanced Technology, Massey University, Palmerston North, New Zealand. AB: [A.Bisht@massey.ac.nz](mailto:A.Bisht@massey.ac.nz); KKTG [K.T.Goh@massey.ac.nz](mailto:K.T.Goh@massey.ac.nz); LMM: [L.Matia-Merino@massey.ac.nz](mailto:L.Matia-Merino@massey.ac.nz)

**\* Corresponding author:**

A/Prof. Dr. Lara Matia-Merino

School of Food and Advanced Technology, Massey University, Private Bag 11222, Palmerston North, 4442, New Zealand

Email: [l.matia-merino@massey.ac.nz](mailto:l.matia-merino@massey.ac.nz)

Telephone: +6469516016

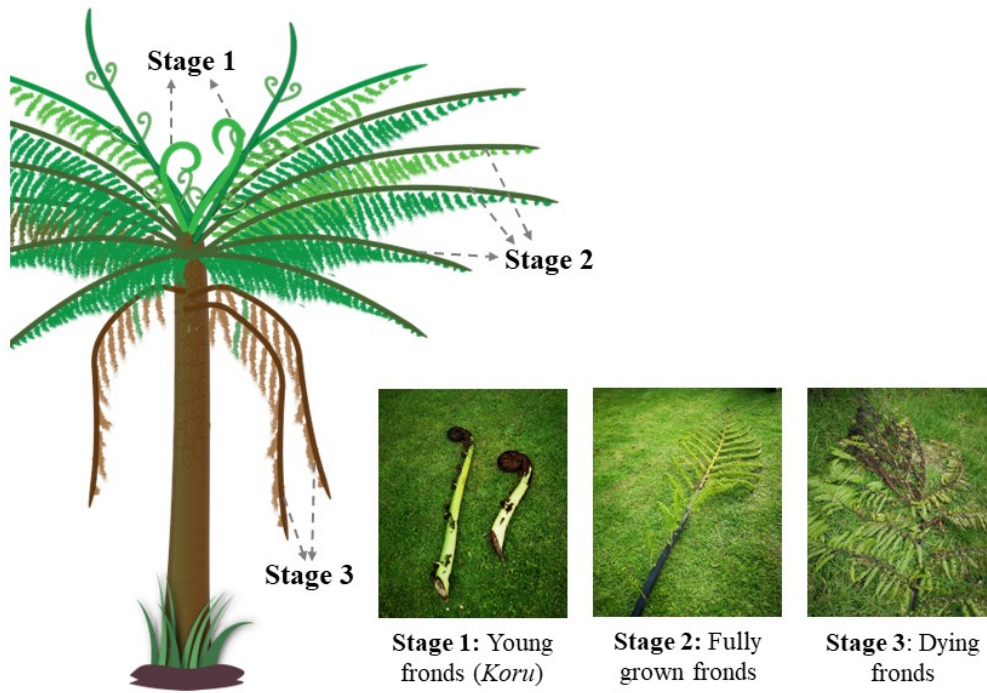

Fig. S1 Pictorial representation of mamaku frond with three stages of harvesting age (stage 1, stage 2 and stage 3).

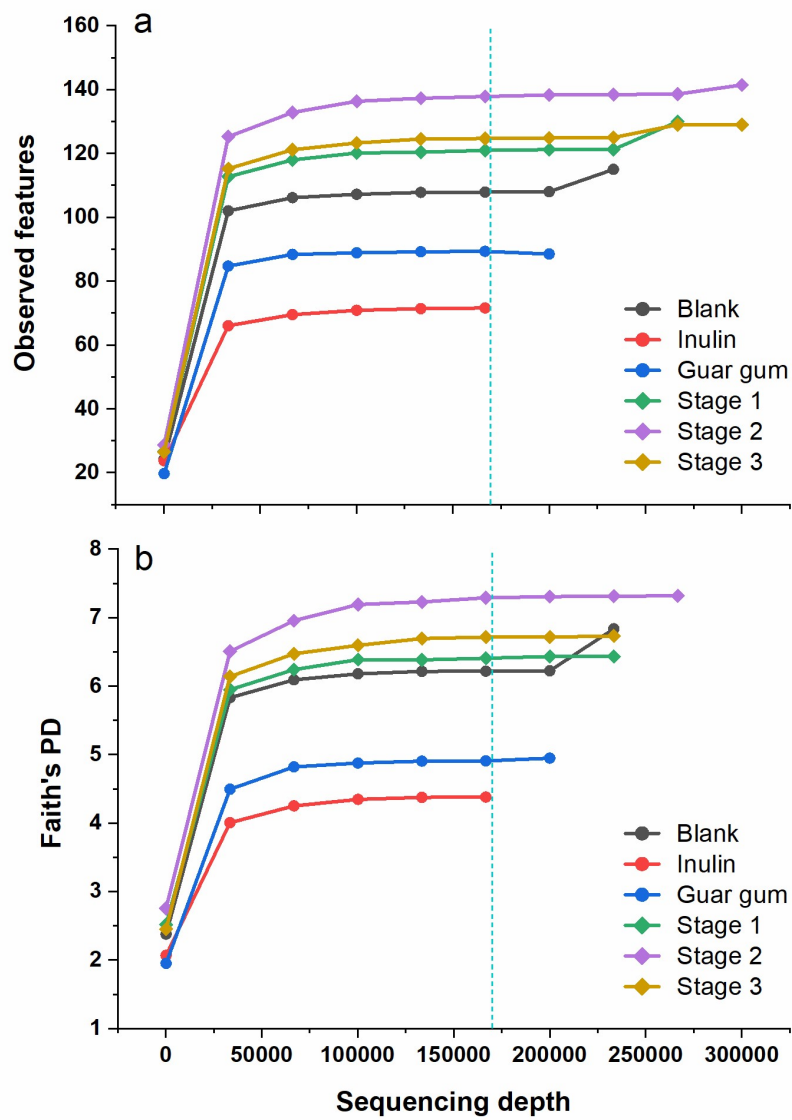

Fig. S2 Alpha rarefaction curve using (a) observed features and (b) Faith's phylogenetic diversity (PD). Dash line represents a sequencing depth of 172,862. Stage 1, 2 and 3 refers to the harvesting age of the mamaku fronds.

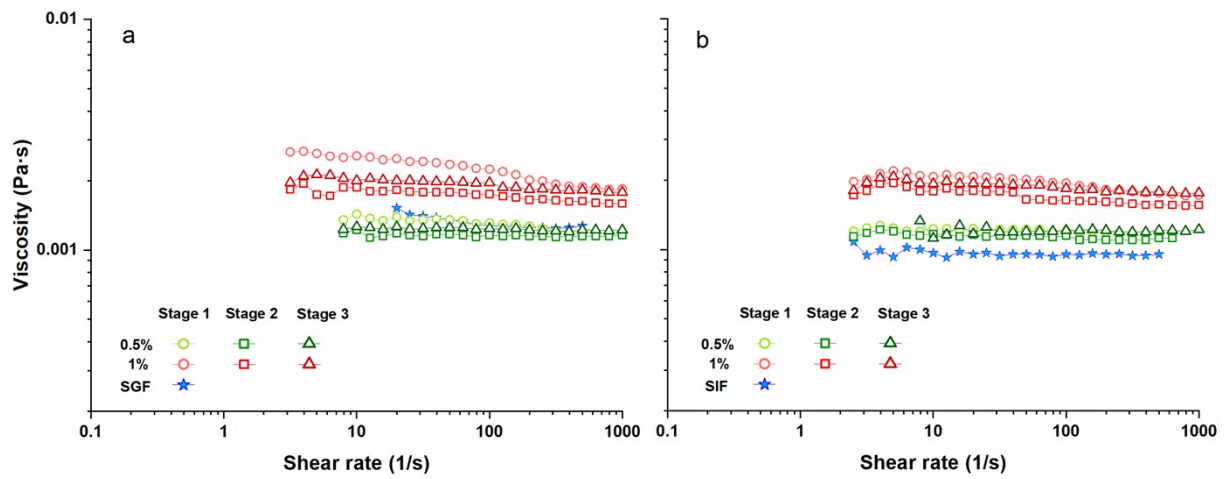

**Fig. S3** Viscosity profiles of mamaku gum (0.5% and 1% w/w) in (a) simulated gastric fluid (SGF) and (b) simulated intestinal fluid (SIF) as a function of shear rate. Measurements were taken using double gap geometry at 20°C.

**Table S1** Composition of simulated fluids used during *in vitro* digestion.

| Salt                                            | Concentration (mM) |            |            |
|-------------------------------------------------|--------------------|------------|------------|
|                                                 | SSF (pH 7)         | SGF (pH 3) | SIF (pH 7) |
| KCl                                             | 15.1               | 6.9        | 6.8        |
| KH <sub>2</sub> PO <sub>4</sub>                 | 3.7                | 0.9        | 0.8        |
| NaHCO <sub>3</sub>                              | 13.6               | 25         | 85         |
| NaCl                                            | -                  | 47.2       | 38.4       |
| MgCl <sub>2</sub> ·6H <sub>2</sub> O            | 0.15               | 0.12       | 0.33       |
| (NH <sub>4</sub> ) <sub>2</sub> CO <sub>3</sub> | 0.06               | 0.5        | -          |
| HCl                                             | 1.1                | 15.6       | 8.4        |
| CaCl <sub>2</sub> ·2H <sub>2</sub> O            | 1.5                | 0.15       | 0.6        |

SSF, simulated salivary fluid; SGF, simulated gastric fluid; SIF, simulated intestinal fluid.

**Table S2** Molecular parameters of purified mamaku gum (stage 1, 2 and 3) at 0, 1 and 2 h during gastric and intestinal digestion, analysed by size-exclusion chromatography coupled with multi-angle laser light scattering (SEC-MALLS).

|                             | Weight-average<br>molar mass,<br>$M_w \times 10^6$ (Da) | Root mean<br>square radius,<br>$R_z$ (nm) | Polydispersity<br>( $M_w/M_n$ ) |
|-----------------------------|---------------------------------------------------------|-------------------------------------------|---------------------------------|
| <i>Gastric digestion</i>    |                                                         |                                           |                                 |
| Stage 1                     |                                                         |                                           |                                 |
| 0h                          | 3.98±0.57 <sup>a</sup>                                  | 147.19±1.11 <sup>a</sup>                  | 1.08±0.01 <sup>a</sup>          |
| 1h                          | 4.01±0.79 <sup>a</sup>                                  | 146.44±2.18 <sup>a</sup>                  | 1.07±0.01 <sup>a</sup>          |
| 2h                          | 4.03±0.18 <sup>a</sup>                                  | 148.03±2.87 <sup>a</sup>                  | 1.08±0.01 <sup>a</sup>          |
| Stage 2                     |                                                         |                                           |                                 |
| 0h                          | 2.51±0.04 <sup>c</sup>                                  | 124.05±3.35 <sup>b</sup>                  | 1.11±0.01 <sup>a</sup>          |
| 1h                          | 2.45±0.14 <sup>c</sup>                                  | 122.27±1.01 <sup>b</sup>                  | 1.12±0.01 <sup>a</sup>          |
| 2h                          | 2.44±0.06 <sup>c</sup>                                  | 122.57±1.27 <sup>b</sup>                  | 1.12±0.01 <sup>a</sup>          |
| Stage 3                     |                                                         |                                           |                                 |
| 0h                          | 2.03±0.05 <sup>e</sup>                                  | 108.65±1.07 <sup>c</sup>                  | 1.08±0.01 <sup>a</sup>          |
| 1h                          | 2.04±0.01 <sup>e</sup>                                  | 109.15±0.25 <sup>c</sup>                  | 1.09±0.01 <sup>a</sup>          |
| 2h                          | 2.03±0.05 <sup>e</sup>                                  | 107.5±1.98 <sup>c</sup>                   | 1.08±0.01 <sup>a</sup>          |
| <i>Intestinal digestion</i> |                                                         |                                           |                                 |
| Stage 1                     |                                                         |                                           |                                 |
| 0h                          | 4.06±0.17 <sup>a</sup>                                  | 148.17±4.11 <sup>a</sup>                  | 1.09±0.01 <sup>a</sup>          |
| 1h                          | 4.12±0.06 <sup>a</sup>                                  | 147.04±1.18 <sup>a</sup>                  | 1.08±0.01 <sup>a</sup>          |
| 2h                          | 4.11±0.1 <sup>a</sup>                                   | 147.64±2.87 <sup>a</sup>                  | 1.08±0.01 <sup>a</sup>          |
| Stage 2                     |                                                         |                                           |                                 |
| 0h                          | 2.69±0.01 <sup>b</sup>                                  | 121.8±2.99 <sup>b</sup>                   | 1.12±0.01 <sup>a</sup>          |
| 1h                          | 2.75±0.08 <sup>b</sup>                                  | 120.47±2.43 <sup>b</sup>                  | 1.12±0.02 <sup>a</sup>          |
| 2h                          | 2.65±0.07 <sup>b</sup>                                  | 122.47±0.96 <sup>b</sup>                  | 1.13±0.01 <sup>a</sup>          |
| Stage 3                     |                                                         |                                           |                                 |
| 0h                          | 2.20±0.08 <sup>d</sup>                                  | 107.7±1.27 <sup>c</sup>                   | 1.1±0.01 <sup>a</sup>           |
| 1h                          | 2.15±0.07 <sup>d</sup>                                  | 106.75±1.91 <sup>c</sup>                  | 1.1±0.02 <sup>a</sup>           |
| 2h                          | 2.23±0.95 <sup>d</sup>                                  | 106.2±2.65 <sup>c</sup>                   | 1.1±0.01 <sup>a</sup>           |

Values are expressed as means ± standard deviation (n=3). Values in the same column denoted with different superscripts are significantly different ( $p \leq 0.05$ ).
